# Supplementary material
Source: publisher site journal article supplement (https://www.dovepress.com/article/326402)
Supplement: Supplementary file 1 [file 15_Jul_2021_Table_S1.pdf › 15_Jul_2021_Table_S1.pdf]

**Table S1.** The list of OVOLs co-expression genes.

| Gene  | Gene Symbol | PCC  | Gene  | Gene Symbol | PCC  | Gene  | Gene Symbol   | PCC  | Gene  | Gene Symbol  | PCC  | Gene  | Gene Symbol        | PCC  |
|-------|-------------|------|-------|-------------|------|-------|---------------|------|-------|--------------|------|-------|--------------------|------|
| OVOL1 | GRTP1       | 0.41 | OVOL1 | LMX1B       | 0.32 | OVOL2 | MLPH          | 0.5  | OVOL2 | GATA3        | 0.41 | OVOL3 | XXbac-BPG299F13.15 | 0.49 |
| OVOL1 | MYB         | 0.39 | OVOL1 | PAQR5       | 0.32 | OVOL2 | ERBB3         | 0.5  | OVOL2 | COQ4         | 0.41 | OVOL3 | AP000648.3         | 0.49 |
| OVOL1 | AP5B1       | 0.38 | OVOL1 | CBX4        | 0.32 | OVOL2 | KCNJ11        | 0.49 | OVOL2 | SOX12        | 0.41 | OVOL3 | DEFA3              | 0.45 |
| OVOL1 | HAGH        | 0.37 | OVOL1 | SMARCC2     | 0.32 | OVOL2 | RRNAD1        | 0.49 | OVOL2 | AP1M2        | 0.41 | OVOL3 | RP11-16E12.2       | 0.43 |
| OVOL1 | CASZ1       | 0.37 | OVOL1 | DDX23       | 0.32 | OVOL2 | FAAH          | 0.48 | OVOL2 | WDR6         | 0.41 | OVOL3 | MRGPRG             | 0.42 |
| OVOL1 | ERBB3       | 0.37 | OVOL1 | PPP1R26-AS1 | 0.32 | OVOL2 | C14orf93      | 0.48 | OVOL2 | NRAV         | 0.41 | OVOL3 | FGF8               | 0.42 |
| OVOL1 | PHF13       | 0.36 | OVOL1 | RXRA        | 0.32 | OVOL2 | C14orf79      | 0.47 | OVOL2 | RAB17        | 0.41 | OVOL3 | HMGB1P1            | 0.41 |
| OVOL1 | HDAC11      | 0.36 | OVOL1 | TUBB4B      | 0.32 | OVOL2 | MYB           | 0.46 | OVOL2 | TMEM115      | 0.41 | OVOL3 | RP11-52L5.6        | 0.41 |
| OVOL1 | TLE3        | 0.36 | OVOL1 | CXorf40B    | 0.32 | OVOL2 | CCDC24        | 0.45 | OVOL2 | HEMK1        | 0.41 | OVOL3 | MRGPRG-AS1         | 0.4  |
| OVOL1 | CNNM3       | 0.36 | OVOL1 | CRAMP1L     | 0.32 | OVOL2 | FOXA1         | 0.45 | OVOL2 | FAM63A       | 0.41 | OVOL3 | RP11-531A24.3      | 0.4  |
| OVOL1 | RAB11FIP3   | 0.36 | OVOL1 | CELSR1      | 0.32 | OVOL2 | PATZ1         | 0.45 | OVOL2 | VPS52        | 0.4  | OVOL3 | CPLX3              | 0.4  |
| OVOL1 | FGFR3       | 0.36 | OVOL1 | WDR24       | 0.32 | OVOL2 | PTMAP3        | 0.45 | OVOL2 | RUNDC1       | 0.4  | OVOL3 | FAM150A            | 0.4  |
| OVOL1 | ZBTB7A      | 0.36 | OVOL1 | COQ7        | 0.32 | OVOL2 | CRNKL1        | 0.45 | OVOL2 | WDR19        | 0.4  | OVOL3 | LRMP               | 0.4  |
| OVOL1 | ZNF768      | 0.35 | OVOL1 | R3HDM2      | 0.32 | OVOL2 | AAAS          | 0.44 | OVOL2 | IFT140       | 0.4  | OVOL3 | MEGF11             | 0.4  |
| OVOL1 | SLC35E2B    | 0.35 | OVOL1 | HDAC1       | 0.32 | OVOL2 | LRRC56        | 0.44 | OVOL2 | CASZ1        | 0.4  | OVOL3 | RP11-1038A11.2     | 0.4  |
| OVOL1 | SDC4        | 0.35 | OVOL1 | LETM1       | 0.32 | OVOL2 | TSTD1         | 0.44 | OVOL2 | ANKMY1       | 0.4  | OVOL3 | RP11-713N11.5      | 0.4  |
| OVOL1 | RAB40C      | 0.35 | OVOL1 | ZNF217      | 0.31 | OVOL2 | NUMA1         | 0.44 | OVOL2 | CELSR1       | 0.4  | OVOL3 | RP11-204E9.1       | 0.4  |
| OVOL1 | ZBTB42      | 0.34 | OVOL1 | PCDH1       | 0.31 | OVOL2 | CTD-2132N18.4 | 0.44 | OVOL2 | C20orf96     | 0.4  | OVOL3 | AC008060.1         | 0.4  |
| OVOL1 | DNAJC14     | 0.34 | OVOL1 | ARID1A      | 0.31 | OVOL2 | COG7          | 0.44 | OVOL2 | MBD6         | 0.4  | OVOL3 | RP11-24J11.1       | 0.4  |
| OVOL1 | ESR1        | 0.34 | OVOL1 | GATA3       | 0.31 | OVOL2 | ATRIP         | 0.43 | OVOL2 | HKR1         | 0.4  | OVOL3 | RN7SL408P          | 0.4  |
| OVOL1 | STRBP       | 0.34 | OVOL1 | LRRC56      | 0.31 | OVOL2 | RP11-333E13.4 | 0.43 | OVOL2 | ZNF337       | 0.4  | OVOL3 | CTA-992D9.6        | 0.4  |
| OVOL1 | RARG        | 0.34 | OVOL1 | GLYR1       | 0.31 | OVOL2 | ATP5G2        | 0.43 | OVOL2 | POLL         | 0.4  | OVOL3 | LINC01548          | 0.4  |
| OVOL1 | RNF223      | 0.34 | OVOL1 | FOXO2       | 0.31 | OVOL2 | CHCHD5        | 0.43 | OVOL2 | SIRT3        | 0.4  | OVOL3 | RP11-481E4.2       | 0.39 |
| OVOL1 | OCLN        | 0.34 | OVOL1 | DDI2        | 0.31 | OVOL2 | PRPF40B       | 0.43 | OVOL2 | C2orf81      | 0.4  | OVOL3 | GABRA4             | 0.39 |
| OVOL1 | ARHGAP39    | 0.34 | OVOL1 | SLC35E2     | 0.31 | OVOL2 | SPDEF         | 0.43 | OVOL2 | CCDC71       | 0.4  | OVOL3 | MEF2B              | 0.39 |
| OVOL1 | THSD4       | 0.34 | OVOL1 | PTBP1       | 0.31 | OVOL2 | ZNF446        | 0.43 | OVOL2 | TMEM219      | 0.4  | OVOL3 | GFI1B              | 0.39 |
| OVOL1 | POLR3K      | 0.34 | OVOL1 | PAK6        | 0.31 | OVOL2 | TJP3          | 0.43 | OVOL2 | TTC39A-AS1   | 0.4  | OVOL3 | CACNA1C-AS1        | 0.39 |
| OVOL1 | FBRS        | 0.34 | OVOL1 | PAXIP1      | 0.31 | OVOL2 | TMC4          | 0.43 | OVOL2 | C12orf10     | 0.4  | OVOL3 | LINC00581          | 0.39 |
| OVOL1 | KMT2D       | 0.34 | OVOL1 | NPRL3       | 0.31 | OVOL2 | IRX5          | 0.43 | OVOL2 | CREB3L4      | 0.39 | OVOL3 | PIRT               | 0.39 |
| OVOL1 | FAM134A     | 0.34 | OVOL1 | ZFPM1       | 0.31 | OVOL2 | CNKSR1        | 0.43 | OVOL2 | PXN-AS1      | 0.39 | OVOL3 | RP11-434C1.4       | 0.39 |
| OVOL1 | CXXC5       | 0.34 | OVOL1 | FOXA1       | 0.31 | OVOL2 | KLHDC9        | 0.43 | OVOL2 | HMGCL        | 0.39 | OVOL3 | RP11-87G24.3       | 0.39 |
| OVOL1 | KAT5        | 0.34 | OVOL1 | KIAA1522    | 0.31 | OVOL2 | COQ6          | 0.43 | OVOL2 | GSTO2        | 0.39 | OVOL3 | RP3-513G18.2       | 0.39 |
| OVOL1 | CYTH2       | 0.34 | OVOL1 | PLXNA3      | 0.31 | OVOL2 | PRR36         | 0.42 | OVOL2 | WDR25        | 0.39 | OVOL3 | SKOR2              | 0.39 |
| OVOL1 | MAPK3       | 0.34 | OVOL1 | HOMEZ       | 0.31 | OVOL2 | CTB-179K24.3  | 0.42 | OVOL2 | BNIP1        | 0.39 | OVOL3 | RP11-548K12.4      | 0.39 |
| OVOL1 | ACVR1B      | 0.34 | OVOL1 | ATP6V1G1    | 0.31 | OVOL2 | FUZ           | 0.42 | OVOL2 | THAP4        | 0.39 | OVOL3 | POU4F1             | 0.38 |
| OVOL1 | CGN         | 0.33 | OVOL1 | MKRN1       | 0.31 | OVOL2 | WBP1          | 0.42 | OVOL2 | SLC25A21-AS1 | 0.39 | OVOL3 | CDKL4              | 0.38 |
| OVOL1 | GDI1        | 0.33 | OVOL1 | ATP6AP1     | 0.31 | OVOL2 | DNALI1        | 0.42 | OVOL2 | NOXA1        | 0.39 | OVOL3 | RP11-334G8.1       | 0.38 |
| OVOL1 | VSIG10      | 0.33 | OVOL1 | AXIN1       | 0.31 | OVOL2 | CHD8          | 0.42 | OVOL2 | SH3GLB2      | 0.39 | OVOL3 | MC3R               | 0.38 |
| OVOL1 | CNKSR1      | 0.33 | OVOL1 | MARK2       | 0.31 | OVOL2 | GOLGA2P5      | 0.42 | OVOL2 | STK16        | 0.39 | OVOL3 | RP11-313C15.2      | 0.38 |
| OVOL1 | OVOL1-AS1   | 0.33 | OVOL1 | NECAB3      | 0.31 | OVOL2 | RGL2          | 0.42 | OVOL2 | ZNF444       | 0.39 | OVOL3 | PIF1               | 0.38 |
| OVOL1 | EVPL        | 0.33 | OVOL1 | ZER1        | 0.31 | OVOL2 | RP4-568C11.4  | 0.42 | OVOL2 | LRTOMT       | 0.39 | OVOL3 | ST18               | 0.38 |
| OVOL1 | SEMA3F      | 0.33 | OVOL1 | ZNF174      | 0.3  | OVOL2 | MRFAP1L1      | 0.42 | OVOL2 | PHLDB3       | 0.39 | OVOL3 | CACNA1C-AS2        | 0.38 |
| OVOL1 | TAOK2       | 0.33 | OVOL1 | SLC22A5     | 0.3  | OVOL2 | PRKAB1        | 0.41 | OVOL2 | ACBD4        | 0.39 | OVOL3 | IGLV3-4            | 0.38 |
| OVOL1 | RBM14       | 0.33 | OVOL1 | RUNDC1      | 0.3  | OVOL2 | HHAT          | 0.41 | OVOL2 | C5orf63      | 0.39 | OVOL3 | IGHD               | 0.38 |
| OVOL1 | CLCN7       | 0.33 | OVOL1 | FAM102A     | 0.3  | OVOL2 | FRAT1         | 0.41 | OVOL2 | GON4L        | 0.39 | OVOL3 | CNPY1              | 0.38 |
| OVOL1 | RMND5B      | 0.33 | OVOL1 | FLNB        | 0.3  | OVOL2 | TCEA3         | 0.41 | OVOL2 | VPS16        | 0.39 | OVOL3 | IGHG4              | 0.37 |
| OVOL1 | CXorf40A    | 0.32 | OVOL1 | SH3GLB2     | 0.3  | OVOL2 | PIGQ          | 0.41 | OVOL2 | PMVK         | 0.39 | OVOL3 | RP5-963E22.4       | 0.37 |
| OVOL1 | PPP1R26     | 0.32 | OVOL1 | ZNF213      | 0.3  | OVOL2 | NPRL2         | 0.41 | OVOL2 | IQCD         | 0.39 | OVOL3 | FAM163B            | 0.37 |
| OVOL1 | TNRC18      | 0.32 | OVOL1 | MED18       | 0.3  | OVOL2 | AP1G2         | 0.41 | OVOL2 | DTX3         | 0.39 | OVOL3 | GNAT1              | 0.37 |
| OVOL1 | ZNF823      | 0.32 | OVOL1 | UNKL        | 0.3  | OVOL2 | CSRP2BP       | 0.41 | OVOL2 | IFT43        | 0.39 | OVOL3 | RP11-963H4.6       | 0.37 |
